# Supplementary material for: Metallic phase WSe2 nanoscrolls for the hydrogen evolution reaction
Source: Royal Society of Chemistry journal article supplement (doi:10.1039/d2nj01598f), 2022-01-01
Supplement: d2nj01598f1.pdf [file d2nj01598f1.pdf]

### Supporting Information

#### Metallic phase WSe<sub>2</sub> nanoscrolls for hydrogen evolution reaction

Wei Wang<sup>1</sup>, Yutong Li<sup>1</sup>, Mengjia Li<sup>1</sup>, Hailin Shen<sup>1</sup>, Wei Zhang<sup>1</sup>, Jintao Zhang<sup>1</sup>, Tianyu Liu<sup>1,\*</sup>, Xianqiang Kong<sup>1,\*</sup>,  
Hengchang Bi<sup>2,\*</sup>

<sup>1</sup> School of Chemical Engineering and Materials, Changzhou Institute of Technology, Changzhou 213032, P.R. China,

<sup>2</sup> Shanghai Key Laboratory of Multidimensional Information Processing, School of Communication and Electronic Engineering, East China Normal University, Shanghai 200241, P.R. China

\* Corresponding author (E-mail addresses: liuty@czu.cn (Tianyu Liu); kongxq@czu.cn (Xianqiang Kong); hcbi@cee.ecnu.edu.cn (Hengchang Bi))

## Experimental section

### Synthesis of the M-WSe<sub>2</sub> nanoscrolls

The bulk WSe<sub>2</sub> crystals were put into an agate mortar and ground for about 30 min. After grinding in the agate mortar, the bulk WSe<sub>2</sub> powders were collected. The n-butyllithium solution (2 mL, 1.6 M in hexane) was mixed with the bulk WSe<sub>2</sub> powders (100 mg) and let it still for about 72 h. Then, the Li-intercalated WSe<sub>2</sub> samples were washed with n-hexane three times. Then, the samples were transferred to 40 ml DI water and sonicated for about 30 min. The unexfoliated bulk WSe<sub>2</sub> powders were removed by centrifuging the obtained solution at 1000 r.p.m for 10 min. Then, the obtained suspension was centrifuged at 10,000 r.p.m for another 10 min. The resulting M-WSe<sub>2</sub> nanosheets precipitate was re-dispersed in ethanol (0.1 mg mL<sup>-1</sup>), then let stand for about 72 h. Finally, the spontaneous curled M-WSe<sub>2</sub> nanoscrolls were obtained after centrifuging at 10,000 r.p.m. for 15 min, and re-dispersed in ethanol before usage and characterization. For comparison, 2H WSe<sub>2</sub> nanoscrolls were prepared by a thermal annealing method similar to the previous reported work.[1] First, the M-WSe<sub>2</sub> nanoscrolls dispersion liquid was centrifuged and moved to the vial, and dried in a vacuum drying oven for about 24 h. Then after thermal annealing at 200 °C for 4 h in N<sub>2</sub> the 2H WSe<sub>2</sub> nanoscrolls were obtained.

### Characterization

The field-emission scanning electron microscope (Nova NanoSEM450, FEI, USA) coupled with energy dispersive X-ray spectroscopy (EDX) was used to record scanning electron microscope (SEM) images and EDX spectrum. The crystal structure of the sample was investigated by X-ray diffraction (XRD) on a Rigaku Smartlab 3 kW using CuKα1 radiation (Johansson-type monochromator) and a 1D detector (D/Tex Ultra) in a 2θ range of 10°-80°. The FEI Titan 80-300 instrument was used to record the transmission electron microscopy (TEM) images. The VG ESCALAB 220i-XL spectrometer equipped with a monochromatic Al Kα (1486.7 eV) X-ray source was used to collect the X-ray photoelectron spectroscopy (XPS) data. The WITec system (Germany) using a 532 nm laser excitation with a power of < 0.1 mW was used to investigate the Raman data. The UV-visible spectrophotometer (UV-2700, Shimadzu, Japan) was used to collect the UV-vis absorption spectra at room temperature.

### Electrochemical measurements

All electrochemical measurements were conducted in the standard three-electrode system using a CHI electrochemical workstation (760E) at room temperature. A 0.5 M H<sub>2</sub>SO<sub>4</sub> aqueous solution was employed as the electrolyte. The Ag/AgCl (3 M KCl) and Pt wire were used as the reference electrode and counter electrode, respectively. And the Ag/AgCl electrode was calibrated using a reversible hydrogen electrode (RHE) as reference (Figure S9). The working electrode was prepared by dropping an appropriate amount of the catalyst ink onto a pre-polished glassy carbon (GC) electrode (3 mm in diameter). Inks were fabricated by ultrasonically dispersing 1 mg of the M-WSe<sub>2</sub> nanoscrolls in a suspension containing 1 mg of carbon black, 970 μL of isopropanol, 30 μL of a Nafion (5 wt%) solution. The loading amount of M-WSe<sub>2</sub> nanoscrolls was about 24 μg. All the linear sweep voltammograms (LSV) were measured at a scanning rate of 10 mV s<sup>-1</sup>. Electrochemical impedance spectroscopy (EIS) was measured at the frequency from 0.1 to 100,000 Hz with an amplitude of 10 mV. As a reference, the commercial Pt/C catalyst was also tested.

To assess the electrochemical active surface area (ECSA) through the electrochemical double-layer capacitance (C<sub>dl</sub>, mF cm<sup>-2</sup>) measurement, cyclic voltammograms (CV) of M-WSe<sub>2</sub> nanoscrolls and 2H WSe<sub>2</sub> nanoscrolls were measured in a non-Faradaic region between 0.220 to 0.720 V (versus RHE) in the N<sub>2</sub>-saturated 0.5 M H<sub>2</sub>SO<sub>4</sub> aqueous solution at seven different scan rates (10, 20, 50, 100, 200, 400, and 800 mV s<sup>-1</sup>).

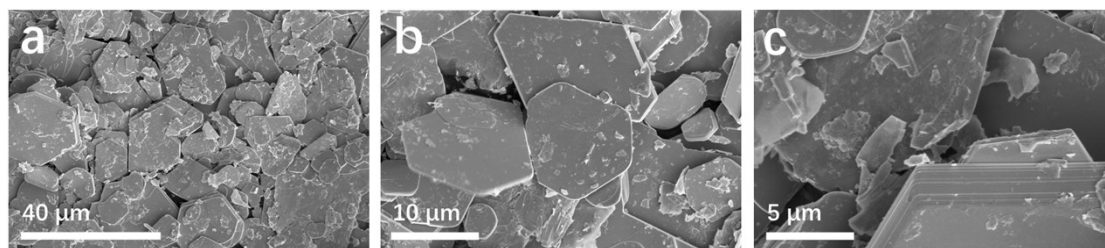

Figure S1. (a-c) SEM images of bulk WSe<sub>2</sub>.

The chemical composition of the bulk WSe<sub>2</sub> precursors has been analyzed by elements mapping and energy dispersive X-ray (EDX) (Figure S2, Figure S3). The STEM image of bulk WSe<sub>2</sub> precursors is displayed in Figure S2a. Figure S2b and S2c show the corresponding elemental mapping results, exhibiting the W and Se elements are distributed homogenously in the plate-like WSe<sub>2</sub> precursors. The EDX results suggest the existence of W and Se elements in the bulk WSe<sub>2</sub> precursors, consisting well with the element mapping results (Figure S3).

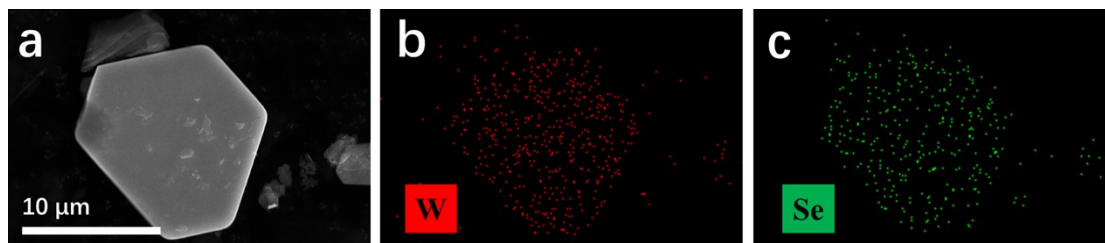

Figure S2. (a-c) elemental mapping of bulk WSe<sub>2</sub> by STEM. a: STEM image of bulk WSe<sub>2</sub>; b,c: the images of tungsten, and selenium elements.

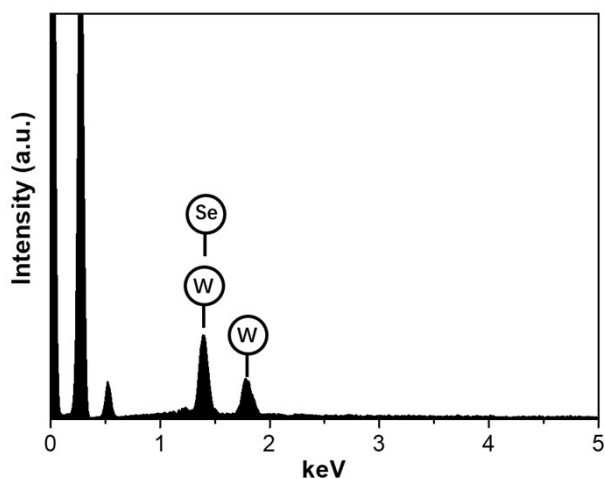

Figure S3. EDX spectrum of bulk WSe<sub>2</sub> powders.

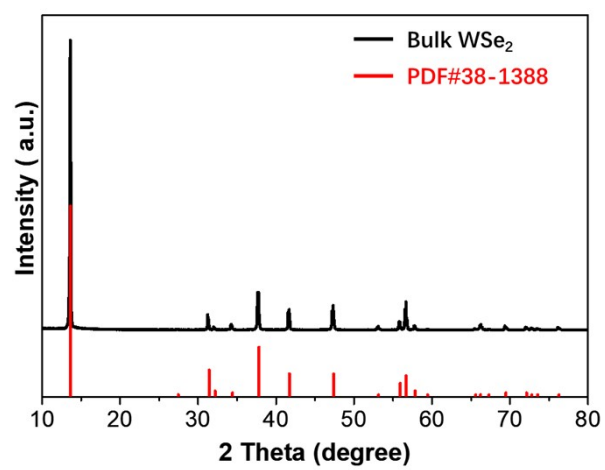

Figure S4. XRD of bulk WSe<sub>2</sub> powders.

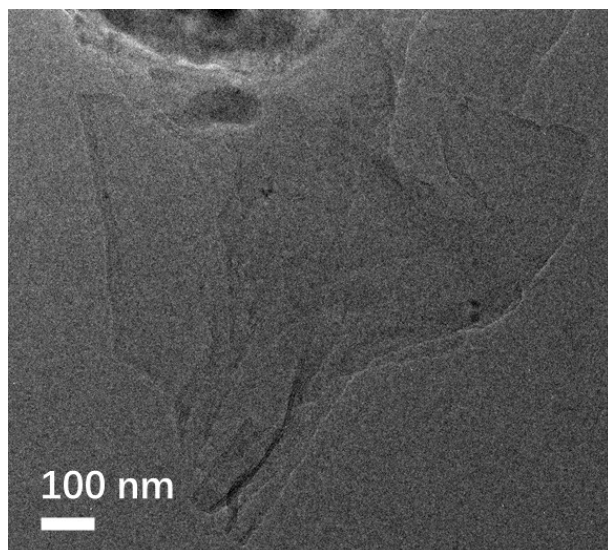

Figure S5. TEM images of M-WSe<sub>2</sub> nanosheets.

Figure S6 show the TEM images of 2H-WSe<sub>2</sub> nanoscrolls. As shown in Figure S6, the obtained samples still display the hollow scroll-like structures, suggesting the scroll-like structures of the materials were not affected by the thermal annealing process obviously.

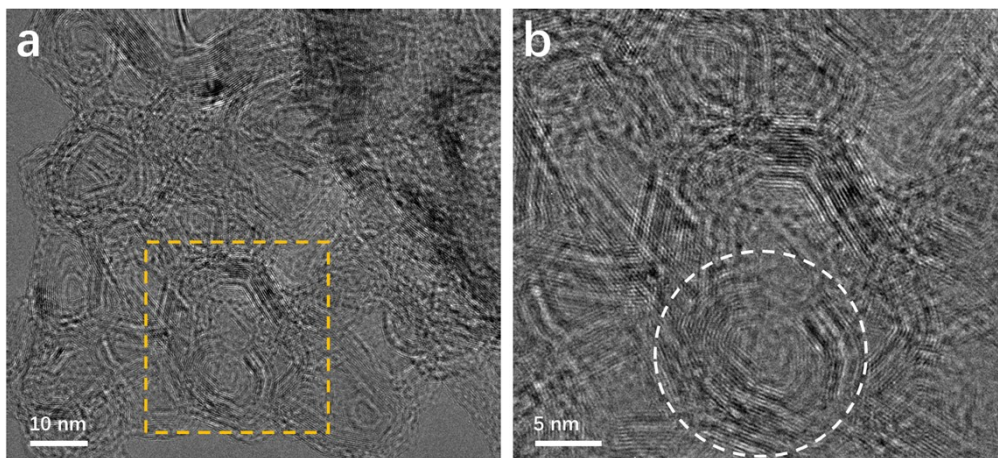

Figure S6. (a) TEM image of 2H-WSe<sub>2</sub> nanoscrolls. (b) Enlarged image of the region enclosed by the yellow rectangle in (a).

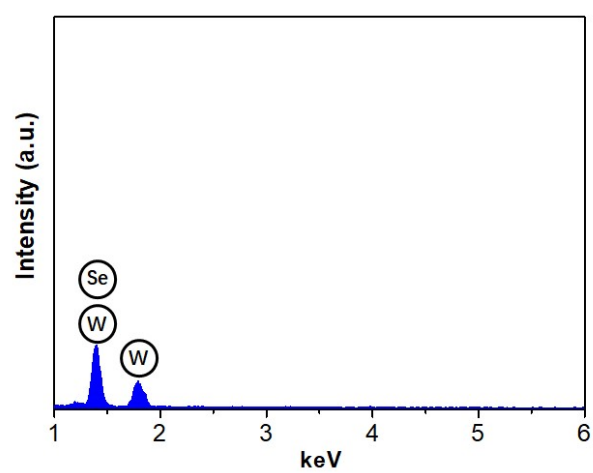

Figure S7. EDX spectrum of M-WSe<sub>2</sub> nanoscrolls.

The deconvolution results of the Se 3d spectrum of the M-WSe<sub>2</sub> nanoscrolls are displayed in Figure S8, which can be fitted with the metallic phase WSe<sub>2</sub> at about 53.7 and 54.6 eV and the 2H phase WSe<sub>2</sub> at about 54.7 and 55.6 eV. These results also suggest the dominant metallic phase of the sample.[2]

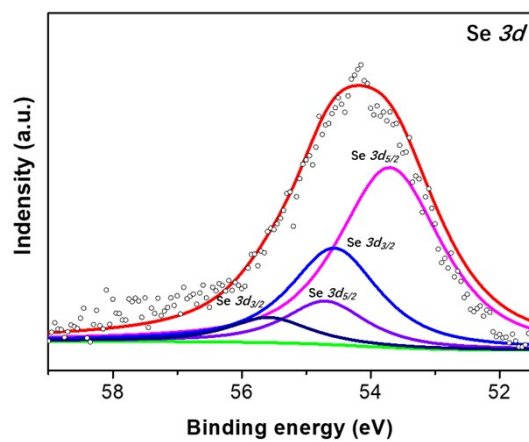

Figure S8. Se 3d XPS spectrum of the M-WSe<sub>2</sub> nanoscrolls.

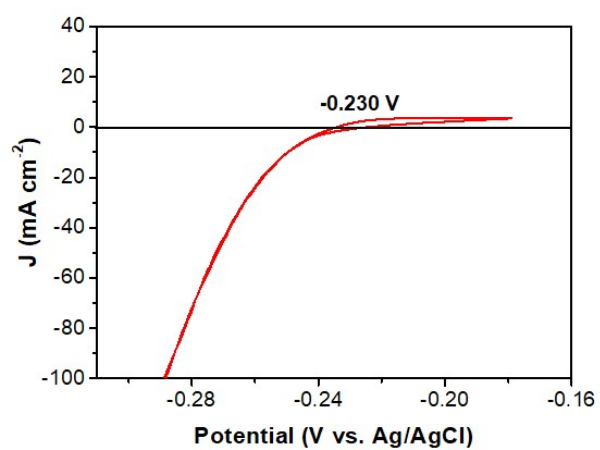

Figure S9. Cyclic voltammetry curve measured at a scan rate of  $1 \text{ mV s}^{-1}$  in  $\text{H}_2$ -saturated  $0.5 \text{ M H}_2\text{SO}_4$  solution for the calibration of Ag/AgCl electrode with respect to RHE. Both the working and counter electrodes are Pt wires in the test.

To understand the origin of such high intrinsic HER activity of our as-prepared M-WSe<sub>2</sub> nanoscrolls, the electrochemical impedance spectroscopy (EIS) analysis was first conducted. As shown in Figure S10, the Nyquist plot of M-WSe<sub>2</sub> nanoscrolls shows a remarkably smaller charge transfer resistance than that of 2H WSe<sub>2</sub> nanoscrolls, indicating the fast charge transfer process in M-WSe<sub>2</sub> nanoscrolls. This should be one of the main reasons for their high HER activity. The small charge transfer resistance of nanoscrolls could be attributed to the high conductivity resulting from the unique metallic phase structure. As known, WSe<sub>2</sub> in the metallic phase exhibits metallic conductivity while the one in the 2H phase is a semiconductor. Moreover, the specific HER activity of M-WSe<sub>2</sub> and 2H WSe<sub>2</sub> nanoscrolls was estimated and presented in Figure S11 and Figure S12. It can be seen that, under the same applied potential, M-WSe<sub>2</sub> nanoscrolls exhibit a much higher specific current density than 2H WSe<sub>2</sub> nanoscrolls. This suggests that M-WSe<sub>2</sub> nanoscrolls are more intrinsically active for HER as compared with 2H WSe<sub>2</sub> nanoscrolls.[3, 4]

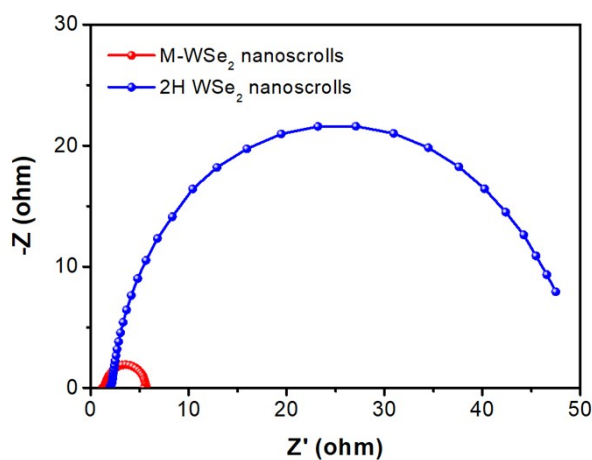

Figure S10. Electrochemical impedance spectroscopy Nyquist plots of metallic WSe<sub>2</sub> nanoscrolls and 2H WSe<sub>2</sub> nanoscrolls at the working potential of -0.282 V (vs. RHE).

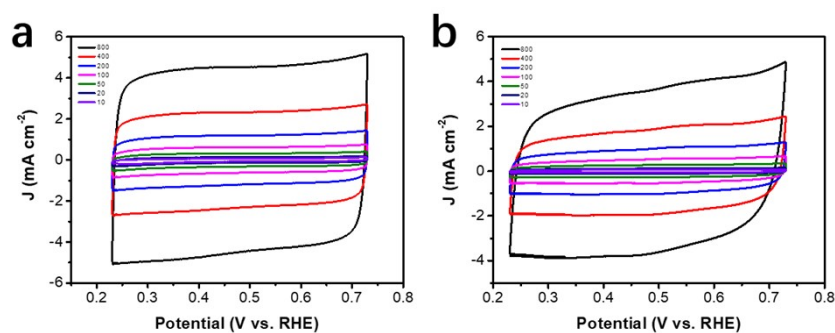

Figure S11. (a, b) Cyclic voltammograms for (a) metallic WSe<sub>2</sub> nanoscrolls and (b) 2H WSe<sub>2</sub> nanoscrolls, which were measured in a non-Faradaic region of the voltammogram at various scan rates.

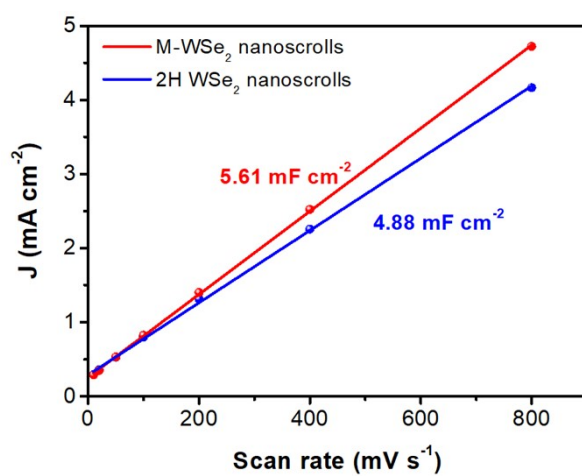

Figure S12. The ECSAs of metallic WSe<sub>2</sub> nanoscrolls and 2H WSe<sub>2</sub> nanoscrolls calculated from CVs measured at various scan rates (10-800 mV s<sup>-1</sup>, Figure S11).

In addition to the good electrocatalytic activity, M-WSe<sub>2</sub> nanoscrolls also have excellent durability for HER. As shown in Figure S13a, the HER polarization curve of M-WSe<sub>2</sub> nanoscrolls measured after 10,000 sweeping cycles almost overlaps with the initial one, indicating the negligible loss in activity during the long-term test. Moreover, the chronoamperometry tests of M-WSe<sub>2</sub> nanoscrolls in Figure S13b also show no apparent decrease in current densities over 12 h. This further confirms the good stability of M-WSe<sub>2</sub> nanoscrolls for HER under acid conditions. Additionally, the cycle stability of the M-WSe<sub>2</sub> nanoscrolls was measured by cyclic voltammetry. As shown in Figure S14, after 10000 cycles there is no significant change in the CV curves, again indicating the good stability of M-WSe<sub>2</sub> nanoscrolls.

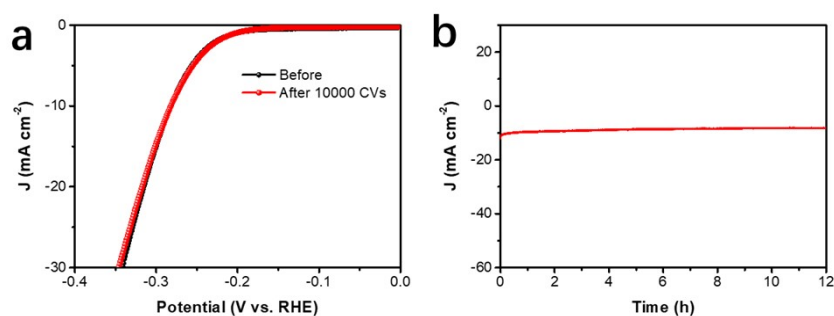

Figure S13. (a,b) Long-term stability tests for M-WSe<sub>2</sub> nanoscrolls. (a) The polarization curves were measured before and after 10,000 sweeping cycles in 0.5 M H<sub>2</sub>SO<sub>4</sub> solution. (b) Chronoamperometric curves of M-WSe<sub>2</sub> nanoscrolls.

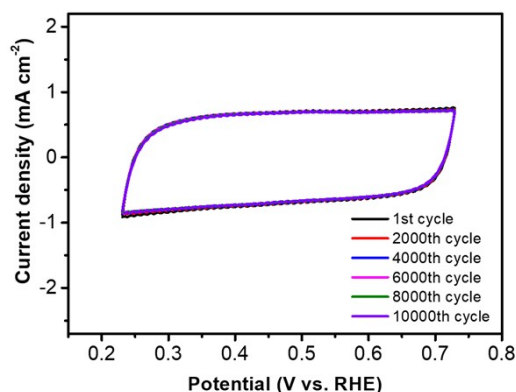

Figure S14. Cyclic voltammograms for metallic WSe<sub>2</sub> nanoscrolls, which were measured in a non-Faradaic region of the voltammogram at scan rates of 100mV s<sup>-1</sup>.

Table S1. Electrochemical HER results for various TMDs-based HER electrocatalysts.

| Electrocatalyst                 | Overpotential at 10 mA cm <sup>-2</sup><br>(mV) | Tafel slope<br>(mV dec <sup>-1</sup> ) | Reference |
|---------------------------------|-------------------------------------------------|----------------------------------------|-----------|
| WSe <sub>2</sub>                | 372                                             | 105                                    | [5]       |
| Spiral WS <sub>2</sub>          | 560 (vs. Ag/AgCl)                               | 81                                     | [6]       |
| Monolayer WS <sub>2</sub>       | 642 (vs. Ag/AgCl)                               | 121                                    | [6]       |
| WS <sub>2</sub> nanosheets      | 310                                             | 95                                     | [7]       |
| Au-MoS <sub>2</sub>             | 263                                             | 71                                     | [8]       |
| Mn(HS)-MoS <sub>2</sub>         | 318                                             | 82                                     | [9]       |
| WS <sub>2</sub> quantum sheets  | 285                                             | 116                                    | [10]      |
| WSe <sub>2</sub> quantum sheets | 331                                             | 78                                     | [10]      |
| WTe <sub>2</sub> quantum sheets | 435                                             | 162                                    | [10]      |
| 2H WSe <sub>2</sub> nanosheets  | 640                                             | 232                                    | [11]      |
| 1T' WSe <sub>2</sub> nanosheets | 510                                             | 150                                    | [11]      |
| M-WSe <sub>2</sub> nanoscrolls  | 282                                             | 82.3                                   | This work |

## References

- [1] Y. Yu, G.H. Nam, Q. He, X.J. Wu, K. Zhang, Z. Yang, J. Chen, Q. Ma, M. Zhao, Z. Liu, F.R. Ran, X. Wang, H. Li, X. Huang, B. Li, Q. Xiong, Q. Zhang, Z. Liu, L. Gu, Y. Du, W. Huang, H. Zhang, High phase-purity 1T'-MoS<sub>2</sub>- and 1T'-MoSe<sub>2</sub>-layered crystals, *Nat. Chem.*, 10 (2018) 638-643.
- [2] N. Rohaizad, C.C. Mayorga-Martinez, Z. Sofer, M. Pumera, 1T-Phase Transition Metal Dichalcogenides (MoS<sub>2</sub>, MoSe<sub>2</sub>, WS<sub>2</sub>, and WSe<sub>2</sub>) with Fast Heterogeneous Electron Transfer: Application on Second-Generation Enzyme-Based Biosensor, *ACS Appl Mater Interfaces*, 9 (2017) 40697-40706.
- [3] Y. Huang, Y. Sun, X. Zheng, T. Aoki, B. Pattengale, J. Huang, X. He, W. Bian, S. Younan, N. Williams, J. Hu, J. Ge, N. Pu, X. Yan, X. Pan, L. Zhang, Y. Wei, J. Gu, Atomically engineering activation sites onto metallic 1T-MoS<sub>2</sub> catalysts for enhanced electrochemical hydrogen evolution, *Nat Commun*, 10 (2019) 982.
- [4] S. Deng, Y. Zhong, Y. Zeng, Y. Wang, Z. Yao, F. Yang, S. Lin, X. Wang, X. Lu, X. Xia, J. Tu, Directional Construction of Vertical Nitrogen-Doped 1T-2H MoSe<sub>2</sub>/Graphene Shell/Core Nanoflake Arrays for Efficient Hydrogen Evolution Reaction, *Adv. Mater.*, 29 (2017) 1700748.
- [5] S.R. Kadam, A.N. Enyashin, L. Houben, R. Bar-Ziv, M. Bar-Sadan, Ni-WSe<sub>2</sub> nanostructures as efficient catalysts for electrochemical hydrogen evolution reaction (HER) in acidic and alkaline media, *J. Mater. Chem. A*, 8 (2020) 1403-1416.
- [6] P.V. Sarma, A. Kayal, C.H. Sharma, M. Thalukulam, J. Mitra, M.M. Shaijumon, Electrocatalysis on Edge-Rich Spiral WS<sub>2</sub> for Hydrogen Evolution, *ACS Nano*, 13 (2019) 10448-10455.
- [7] C. Tan, Z. Luo, A. Chaturvedi, Y. Cai, Y. Du, Y. Gong, Y. Huang, Z. Lai, X. Zhang, L. Zheng, X. Qi, M.H. Goh, J. Wang, S. Han, X.J. Wu, L. Gu, C. Kloc, H. Zhang, Preparation of high-percentage 1T-phase transition metal dichalcogenide nanodots for electrochemical hydrogen evolution, *Adv. Mater.*, 30 (2018) 1705509.
- [8] Y. Li, M.B. Majewski, S.M. Islam, S. Hao, A.A. Murthy, J.G. DiStefano, E.D. Hanson, Y. Xu, C. Wolverton, M.G. Kanatzidis, M.R. Wasielewski, X. Chen, V.P. Dravid, Morphological Engineering of Winged Au@MoS<sub>2</sub> Heterostructures for Electrocatalytic Hydrogen Evolution, *Nano Lett.*, 18 (2018) 7104-7110.
- [9] Z. Cai, T. Shen, Q. Zhu, S. Feng, Q. Yu, J. Liu, L. Tang, Y. Zhao, J. Wang, B. Liu, H.M. Cheng, Dual-Additive Assisted Chemical Vapor Deposition for the Growth of Mn-Doped 2D MoS<sub>2</sub> with Tunable Electronic Properties, *Small*, 16 (2020) e1903181.
- [10] Z. Chen, Y. Li, K. Wang, Y. Zhang, Scalable production of intrinsic WX<sub>2</sub> (X = S, Se, Te) quantum sheets for efficient hydrogen evolution electrocatalysis, *Nanotechnology*, 32 (2021).
- [11] M.S. Sokolikova, P.C. Sherrell, P. Palczynski, V.L. Bemmer, C. Mattevi, Direct solution-phase synthesis of 1T' WSe<sub>2</sub> nanosheets, *Nat. Commun.*, 10 (2019).
